# Supplementary material for: Recent advances in bacteriophage-based therapeutics: Insight into the post-antibiotic era
Source: PubMed Central journal article supplement — Acta Pharm Sin B. 2022 May 13;12(12):4348–64. doi: 10.1016/j.apsb.2022.05.007 (PMC9764073; doi:10.1016/j.apsb.2022.05.007), 2022-05-13
Supplement: mmc1.pdf [file mmc1.pdf]

## Supporting Information for

Review

### **Recent advances in bacteriophage-based therapeutics: insight into the post-antibiotic era**

**Hao Ling<sup>a</sup>, Xinyu Lou<sup>a</sup>, Qiuhua Luo<sup>b</sup>, Zhonggui He<sup>a</sup>, Mengchi Sun<sup>a,\*</sup>, Jin Sun<sup>a,\*</sup>**

<sup>a</sup>*Wuya College of Innovation, Shenyang Pharmaceutical University, Shenyang 110016, China*

<sup>b</sup>*Department of Pharmacy, The First Affiliated Hospital of China Medical University, Shenyang 110001, China*

Received 28 January 2022; received in revised form 7 April 2022; accepted 18 April 2022

\*Corresponding authors.

E-mail addresses: [sunjin@syphu.edu.cn](mailto:sunjin@syphu.edu.cn) (Jin Sun), [smc\\_1990@aliyun.com](mailto:smc_1990@aliyun.com) (Mengchi Sun).

**Runng title:** Recent advances in bacteriophage-based therapeutics

**Table S1** Summary of clinical trials of bacteriophage therapy in the last three years.

| NCT Number  | Title                                                                                                                     | Condition                                                                      | Drug                                                                                                          | Intervention    | Study type     | Phase                |
|-------------|---------------------------------------------------------------------------------------------------------------------------|--------------------------------------------------------------------------------|---------------------------------------------------------------------------------------------------------------|-----------------|----------------|----------------------|
| NCT04787250 | Bacteriophage therapy in patients with prosthetic joint infections                                                        | •Prosthetic joint infection                                                    | •Bacteriophage based on patient's matching results                                                            | NA              | Interventional | •Phase 1<br>•Phase 2 |
| NCT04650607 | Bacteriophage safety cohort study                                                                                         | •Prosthetic joint infection<br>•Bone and joint infection<br>•Implant infection | •Bacteriophage will be administered based on patient's matching results                                       | NA              | Observational  | NA                   |
| NCT04323475 | Bacteriophage therapy for the prevention and treatment of wound infections in burned patients                             | •Wound infection                                                               | •Bacteriophage cocktail-SPK                                                                                   | •Drug: xeroform | Interventional | •Phase 1             |
| NCT04684641 | Cystic fibrosis bacteriophage study at yale (CYPHY)                                                                       | •Cystic fibrosis                                                               | •Bacteriophage YPT-01                                                                                         | •Other: placebo | Interventional | •Phase 1<br>•Phase 2 |
| NCT04289948 | Assessing the efficacy of <i>anti-staphylococcal</i> bacteriophages in the management of infected foot ulcers in diabetes | •Diabetes<br>•Diabetic foot<br>•Diabetic foot infection                        | •Bacteriophage cocktail of at least 2–3 <i>anti-staphylococcal</i> bacteriophages produced by Intralytix Inc. | NA              | Interventional | •Phase 1<br>•Phase 2 |
| NCT04287478 | Bacteriophage therapy in patients with urinary tract infections                                                           | •Urinary tract infection bacterial                                             | •Bacteriophage administered based on patient's matching results                                               | NA              | Interventional | •Phase 1<br>•Phase 2 |

|             |                                                                                                                               |                                                                                                             |                                                                                                                   |                                                                                                                                                          |                                                                  |                                                                              |
|-------------|-------------------------------------------------------------------------------------------------------------------------------|-------------------------------------------------------------------------------------------------------------|-------------------------------------------------------------------------------------------------------------------|----------------------------------------------------------------------------------------------------------------------------------------------------------|------------------------------------------------------------------|------------------------------------------------------------------------------|
| NCT02664740 | Standard treatment associated with bacteriophage therapy versus placebo for diabetic foot ulcers infected by <i>S. aureus</i> | <ul style="list-style-type: none"> <li>•Diabetic toot</li> <li>•<i>Staphylococcal</i> infections</li> </ul> | <ul style="list-style-type: none"> <li>•Bacteriophage administered based on patient’s matching results</li> </ul> | <ul style="list-style-type: none"> <li>•Drug: topical anti <i>staphylococcus</i> bacteriophage therapy</li> </ul>                                        | <ul style="list-style-type: none"> <li>•Industry</li> </ul>      | <ul style="list-style-type: none"> <li>•Phase 1</li> <li>•Phase 2</li> </ul> |
| NCT04682964 | Bacteriophage therapy in tonsillitis                                                                                          | <ul style="list-style-type: none"> <li>•Acute tonsillitis</li> </ul>                                        | <ul style="list-style-type: none"> <li>•Pyobacteriophage complex liquid—PCL</li> </ul>                            | <ul style="list-style-type: none"> <li>•Drug: nebulizer inhalation irrigation of the mucous membranes of the tonsils with a bacteriophage.</li> </ul>    | <ul style="list-style-type: none"> <li>Interventional</li> </ul> | <ul style="list-style-type: none"> <li>•Phase 3</li> </ul>                   |
| NCT01617122 | Evaluate bacteriophage as a useful immunogen in patients with primary immune deficiency diseases (PID)                        | <ul style="list-style-type: none"> <li>•Primary immune deficiency diseases</li> </ul>                       | <ul style="list-style-type: none"> <li>•Bacteriophage 0X174</li> </ul>                                            | <ul style="list-style-type: none"> <li>NA</li> </ul>                                                                                                     | <ul style="list-style-type: none"> <li>Interventional</li> </ul> | <ul style="list-style-type: none"> <li>NA</li> </ul>                         |
| NCT04511221 | Bacteriophage for gastrointestinal health 2 Study                                                                             | Mild gastrointestinal symptoms in healthy adults                                                            | <ul style="list-style-type: none"> <li>•The commercial bacteriophage preparation—PreforPro</li> </ul>             | <ul style="list-style-type: none"> <li>•Dietary supplement: bifidobacterium animals <i>subsp. lactis</i> <i>BL04</i></li> <li>•Other: placebo</li> </ul> | <ul style="list-style-type: none"> <li>Interventional</li> </ul> | <ul style="list-style-type: none"> <li>NA</li> </ul>                         |
| NCT00945087 | Experimental bacteriophage therapy of bacterial infections                                                                    | <ul style="list-style-type: none"> <li>•Bacterial infections</li> </ul>                                     | <ul style="list-style-type: none"> <li>•Bacteriophage lysates or purified bacteriophage formulations</li> </ul>   | <ul style="list-style-type: none"> <li>Bacteriophage lysates or purified bacteriophage formulations for 10 pathogens</li> </ul>                          | <ul style="list-style-type: none"> <li>Interventional</li> </ul> | <ul style="list-style-type: none"> <li>NA</li> </ul>                         |
| NCT03296631 | Bacteriophages dynamics and influences during human gut microbiome establishment                                              | <ul style="list-style-type: none"> <li>•Human gut microbiome development</li> </ul>                         | <ul style="list-style-type: none"> <li>•Bacteriophages during infant gut development</li> </ul>                   | <ul style="list-style-type: none"> <li>•Other: collection of diapers with fresh stools</li> </ul>                                                        | <ul style="list-style-type: none"> <li>Observational</li> </ul>  | <ul style="list-style-type: none"> <li>NA</li> </ul>                         |

|             |                                                                                                                                        |                                                                    |                                                                                 |                                                                                                                                |                |                      |
|-------------|----------------------------------------------------------------------------------------------------------------------------------------|--------------------------------------------------------------------|---------------------------------------------------------------------------------|--------------------------------------------------------------------------------------------------------------------------------|----------------|----------------------|
| NCT01818206 | Bacteriophage effects on <i>Pseudomonas aeruginosa</i>                                                                                 | •Cystic fibrosis                                                   | •A cocktail of 10 bacteriophages                                                | •Other: collection of induced sputum in order to evaluate the efficacy of a cocktail of 10 bacteriophages.                     | Interventional | NA                   |
| NCT02116010 | Evaluation of bacteriophage therapy for the treatment of escherichia coli and <i>Pseudomonas . aeruginosa</i> (PA) wound infections in | •Wound infection                                                   | • <i>E. coli</i> bacteriophages cocktail<br>• <i>PA</i> bacteriophages cocktail | •Drug: <i>E. coli</i> bacteriophages cocktail<br>•Drug: standard of care: silver sulfadiazine<br>•Drug: <i>PA</i> ,            | Interventional | •Phase 1<br>•Phase 2 |
| NCT03140085 | Bacteriophages for treating urinary tract infections in patients undergoing transurethral resection of the prostate                    | •Intravesical bacteriophage treatment for urinary tract infections | •PYO bacteriophage                                                              | •Biological: PYO bacteriophage<br>•Drug: antibiotics<br>•Other: sterile bacteriology media                                     | Interventional | •Phase 2<br>•Phase 3 |
| NCT04815798 | Bacteriophage therapy for the prevention and treatment of pressure ulcers.                                                             | •Pressure ulcer                                                    | •Bacteriophage therapy combination product—BACTELIDE                            | •Combination product: bacteriophage loaded microcapsule spray<br>•Combination product: placebo<br>•Procedure: standard of care | Interventional | •Phase 1<br>•Phase 2 |
| NCT03269617 | Bacteriophage study: bacteriophages as novel prebiotics                                                                                | •Gastrointestinal disorder, functional                             | •PeforPro                                                                       | •Dietary supplement: bacteriophage mixture<br>•Other: placebo control                                                          | Interventional | NA                   |

|             |                                                                                                                                          |                                                                                                                                                                                                |                                                                                                                   |                                                                                                                                                          |                |                                                                              |
|-------------|------------------------------------------------------------------------------------------------------------------------------------------|------------------------------------------------------------------------------------------------------------------------------------------------------------------------------------------------|-------------------------------------------------------------------------------------------------------------------|----------------------------------------------------------------------------------------------------------------------------------------------------------|----------------|------------------------------------------------------------------------------|
| NCT04724603 | Bacteriophage safety retrospective cohort study                                                                                          | <ul style="list-style-type: none"> <li>•Bone and joint infection</li> <li>•Prosthetic joint infection</li> </ul>                                                                               | <ul style="list-style-type: none"> <li>•Bacteriophage administered based on patient's matching results</li> </ul> | <ul style="list-style-type: none"> <li>•Other: patients having had avderse event after phagotherapy for bone or joint or implant infection</li> </ul>    | Observational  | NA                                                                           |
| NCT00937274 | Antibacterial treatment against diarrhea in oral rehydration solution                                                                    | <ul style="list-style-type: none"> <li>•Diarrhea</li> </ul>                                                                                                                                    | <ul style="list-style-type: none"> <li>•T4 bacteriophage cocktail</li> </ul>                                      | <ul style="list-style-type: none"> <li>•Other: commercial T4 bacteriophage cocktail</li> <li>•Other: standard oral rehydration solution (ORS)</li> </ul> | Interventional | NA                                                                           |
| NCT04596319 | Ph 1/2 study evaluating safety and tolerability of inhaled APPA02 in subjects with chronic <i>PA</i> lung infections and cystic fibrosis | <ul style="list-style-type: none"> <li>•Cystic fibrosis</li> <li>•<i>PA</i></li> <li>•<i>Pseudomonas</i></li> <li>•Lung infection</li> <li>•Lung infection <i>Pseudomonal</i></li> </ul>       | <ul style="list-style-type: none"> <li>•AP-PA02</li> </ul>                                                        | <ul style="list-style-type: none"> <li>•Other: placebo</li> </ul>                                                                                        | Interventional | <ul style="list-style-type: none"> <li>•Phase 1</li> <li>•Phase 2</li> </ul> |
| NCT04803708 | Bacteriophage therapy TP-102 in diabetic foot ulcers                                                                                     | <ul style="list-style-type: none"> <li>•Diabetic foot ulcer</li> <li>•<i>PA</i> infection</li> <li>•<i>Staphylococcus aureus</i> Infection</li> <li>•<i>Acinetobacter</i> Infection</li> </ul> | <ul style="list-style-type: none"> <li>•TP-102</li> </ul>                                                         | NA                                                                                                                                                       | Interventional | <ul style="list-style-type: none"> <li>•Phase 1</li> <li>•Phase 2</li> </ul> |

|             |                                                                                                                                   |                                           |            |                      |                                         |                      |
|-------------|-----------------------------------------------------------------------------------------------------------------------------------|-------------------------------------------|------------|----------------------|-----------------------------------------|----------------------|
| NCT00663091 | A prospective, randomized, double-blind controlled study of WPP-201 for the safety and efficacy of treatment of venous leg ulcers | •Venous leg ulcers                        | •WPP-201   | NA                   | Interventional                          | •Phase 1<br>•Phase 2 |
| NCT03808103 | Safety and efficacy of ecoctive on intestinal adherent invasive <i>E. coli</i> in patients with inactive Crohn's disease          | •Crohn's disease                          | •EcoActive | •Biological: placebo | Interventional                          | •Phase 1<br>•Phase 2 |
| NCT03395769 | Individual patient expanded access for AB-SA01, an investigational <i>anti-Staphylococcus aureus</i> bacteriophage therapeutic    | • <i>Staphylococcus aureus</i> infections | •AB-SA01   | NA                   | Expanded access<br>•Individual patients | NA                   |
| NCT03395743 | Individual patient expanded access for AB-PA01, an investigational <i>Anti-pseudomonas Aeruginosa</i> bacteriophage therapeutic   | • <i>PA</i> infections                    | •AB-PA01   | NA                   | Expanded access<br>•Individual patients | NA                   |

|             |                                                                                                                     |                                                                                                                                                                                                                                                          |             |                                                                                                      |                |          |
|-------------|---------------------------------------------------------------------------------------------------------------------|----------------------------------------------------------------------------------------------------------------------------------------------------------------------------------------------------------------------------------------------------------|-------------|------------------------------------------------------------------------------------------------------|----------------|----------|
| NCT04325685 | The effect of supraglottic and oropharyngeal decontamination on the incidence of ventilator-associated pneumonia    | <ul style="list-style-type: none"> <li>•Trauma injury</li> <li>•Brain injuries</li> <li>•Abdominal sepsis</li> <li>•Pancreatitis</li> <li>•Meningitis</li> <li>•Encephalitis</li> <li>•Seizures</li> <li>•Acute respiratory distress syndrome</li> </ul> | •Sexthaphag | <ul style="list-style-type: none"> <li>•Drug: control</li> <li>•Drug: antiseptic solution</li> </ul> | Interventional | NA       |
| NCT03326947 | Bacteriophage II trial of stathmin as predictive biomarker for TPF Induction chemotherapy in OSCC                   | <ul style="list-style-type: none"> <li>•Neoplasm neck</li> </ul>                                                                                                                                                                                         | •Stathmin   | <ul style="list-style-type: none"> <li>•Drug: docetaxel, cisplatin and 5-fluorouracil</li> </ul>     | Interventional | •Phase 2 |
| NCT03972826 | Use of provodine to protect HCW Hands (Aim II.1)                                                                    | <ul style="list-style-type: none"> <li>•Infection</li> </ul>                                                                                                                                                                                             | •Provodine  | NA                                                                                                   | Interventional | NA       |
| NCT04191148 | Safety, tolerability, and PK of LBP-EC01 in patients with lower urinary tract colonization caused by <i>E. Coli</i> | <ul style="list-style-type: none"> <li>•Urinary tract infections</li> </ul>                                                                                                                                                                              | •LBP-EC01   | <ul style="list-style-type: none"> <li>•Drug: lactated ringers solution for injection</li> </ul>     | Interventional | •Phase 1 |
| NCT00306878 | Phase I study of BMS-188667 (CTLA4Ig) in patients with <i>Psoriasis vulgaris</i>                                    | <ul style="list-style-type: none"> <li>•Psoriasis vulgaris</li> </ul>                                                                                                                                                                                    | •Abatacept  | NA                                                                                                   | Interventional | •Phase 1 |
| NCT04737876 | A study to evaluate the safety, tolerability, and fecal pharmacokinetics of BX002-A in healthy adults               | <ul style="list-style-type: none"> <li>•Healthy volunteers</li> </ul>                                                                                                                                                                                    | •BX002-A    | <ul style="list-style-type: none"> <li>•Other: placebo</li> </ul>                                    | Interventional | •Phase 1 |

|             |                                                                                                                                  |                                                                                                                                                                                               |                                                                                                           |                                                                                                                                                        |                |                                                            |
|-------------|----------------------------------------------------------------------------------------------------------------------------------|-----------------------------------------------------------------------------------------------------------------------------------------------------------------------------------------------|-----------------------------------------------------------------------------------------------------------|--------------------------------------------------------------------------------------------------------------------------------------------------------|----------------|------------------------------------------------------------|
| NCT00916292 | Safety study of topical human FGF-1 for wound healing                                                                            | <ul style="list-style-type: none"> <li>•Diabetic foot ulcers</li> </ul>                                                                                                                       | <ul style="list-style-type: none"> <li>•FGF-1 141</li> </ul>                                              | <ul style="list-style-type: none"> <li>•Drug: FGF-1 141</li> </ul>                                                                                     | Interventional | <ul style="list-style-type: none"> <li>•Phase 1</li> </ul> |
| NCT00089180 | T4N5 liposomal lotion in preventing the recurrence of nonmelanoma skin cancer in patients who have undergone a kidney transplant | <ul style="list-style-type: none"> <li>•Actinic keratosis</li> <li>•Basal cell carcinoma of the skin</li> <li>•Recurrent skin cancer</li> <li>•Squamous cell carcinoma of the skin</li> </ul> | <ul style="list-style-type: none"> <li>•Liposomal T4N5 lotion</li> </ul>                                  | <ul style="list-style-type: none"> <li>•Drug: liposomal T4N5 lotion</li> <li>•Other: placebo</li> <li>•Other: laboratory biomarker analysis</li> </ul> | Interventional | <ul style="list-style-type: none"> <li>•Phase 2</li> </ul> |
| NCT00001145 | Study of immune responses and safety of recombinant human CD40 ligand in patients with X-linked hyper-IgM syndrome               | <ul style="list-style-type: none"> <li>•Immunoproliferative disorder</li> </ul>                                                                                                               | <ul style="list-style-type: none"> <li>•Bacteriophage Phi-X 174</li> </ul>                                | <ul style="list-style-type: none"> <li>•Drug: bacteriophage</li> <li>•Drug: rhuCD40L</li> <li>•Drug: KLH</li> </ul>                                    | Interventional | <ul style="list-style-type: none"> <li>•Phase 2</li> </ul> |
| NCT02828774 | Peptide-drug-conjugates for personalized, targeted therapy of chronic lymphocytic leukemia                                       | <ul style="list-style-type: none"> <li>•CLL</li> </ul>                                                                                                                                        | <ul style="list-style-type: none"> <li>•Bacteriophage specifically internalized by B-CLL cells</li> </ul> | <ul style="list-style-type: none"> <li>•Other: there will be no intervention.</li> </ul>                                                               | Observational  | <ul style="list-style-type: none"> <li>NA</li> </ul>       |
| NCT00785967 | Immune responses in patients treated with raltegravir                                                                            | <ul style="list-style-type: none"> <li>•HIV infections</li> </ul>                                                                                                                             | <ul style="list-style-type: none"> <li>•Bacteriophage phiX174</li> </ul>                                  | <ul style="list-style-type: none"> <li>•Biological: various vaccines</li> </ul>                                                                        | Interventional | <ul style="list-style-type: none"> <li>•Phase 3</li> </ul> |
| NCT02757755 | Ascending dose study of the safety of AB-SA01 when topically applied to intact skin of healthy adults                            | <ul style="list-style-type: none"> <li>•Healthy volunteers</li> </ul>                                                                                                                         | <ul style="list-style-type: none"> <li>•ABSA01</li> <li>•Placebo</li> </ul>                               | <ul style="list-style-type: none"> <li>•Biological: placebo</li> </ul>                                                                                 | Interventional | <ul style="list-style-type: none"> <li>•Phase 1</li> </ul> |
| NCT01640886 | Study of the performance of the KeyPath MRSA/MSSA blood culture test - BTA                                                       | <ul style="list-style-type: none"> <li>•Bacteremia</li> </ul>                                                                                                                                 | <ul style="list-style-type: none"> <li>•Microbacteriophage</li> </ul>                                     | <ul style="list-style-type: none"> <li>NA</li> </ul>                                                                                                   | Observational  | <ul style="list-style-type: none"> <li>NA</li> </ul>       |



|             |                                                                                                                                       |                                                                                                                                       |                                                    |                                                                                                                                            |                |    |
|-------------|---------------------------------------------------------------------------------------------------------------------------------------|---------------------------------------------------------------------------------------------------------------------------------------|----------------------------------------------------|--------------------------------------------------------------------------------------------------------------------------------------------|----------------|----|
| NCT00814151 | Microbacteriophage <i>S. aureus</i> / MSSA / MRSA blood culture beta trial                                                            | <ul style="list-style-type: none"> <li>•Bacteremia</li> <li>•Staphylococcal infection</li> <li>•Sepsis</li> <li>•Infection</li> </ul> | •Microbacteriophage                                | <ul style="list-style-type: none"> <li>•Other: Microbacteriophage <i>S. aureus</i> / MSSA / MRSA Blood Culture Test (prototype)</li> </ul> | Observational  | NA |
| NCT01184339 | Prospective study into the performance of the Microbacteriophage <i>S. Aureus</i> /MSSA/MRSA test direct from blood culture positives | •Bacteremia                                                                                                                           | •Microbacteriophage                                | <ul style="list-style-type: none"> <li>•Device: Microbacteriophage <i>S. aureus</i>/MSSA/MRSA blood culture test</li> </ul>                | Observational  | NA |
| NCT01693965 | Clinical course and changes in the respiratory microbiota based on antibiotic treatment in patients with cystic fibrosis              | •Bronchopulmonary infection                                                                                                           | •Bacteriophage based on patient's matching results | •Other: sputum samples                                                                                                                     | Interventional | NA |
| NCT03967236 | Impact of intestinal virome on pediatric inflammatory bowel disease                                                                   | •Inflammatory bowel diseases                                                                                                          | •Bacteriophage based on patient's matching results | •Other: collection of stool and blood samples                                                                                              | Observational  | NA |
| NCT04791644 | Faecal microbiota characterization in lynch syndrome (LS) patients with or without colorectal neoplasia                               | •Lynch syndrome                                                                                                                       | •Bacteriophage based on patient's matching results | •Other: evaluation of the true role of gut microbiota in CRC carcinogenesis                                                                | Observational  | NA |

|             |                                                                                                                                        |                                                                                                                                                                           |                                                    |                                                                         |                |          |
|-------------|----------------------------------------------------------------------------------------------------------------------------------------|---------------------------------------------------------------------------------------------------------------------------------------------------------------------------|----------------------------------------------------|-------------------------------------------------------------------------|----------------|----------|
| NCT03418454 | The oral microbiome as a prognostic tool in oral malignant and premalignant lesions and in medication related osteonecrosis of the jaw | <ul style="list-style-type: none"> <li>•Oral squamous cell carcinoma</li> <li>•Medication related osteonecrosis of the jaw</li> <li>•Oral epithelial dysplasia</li> </ul> | •Bacteriophage based on patient's matching results | •Diagnostic test: buccal mucosa samples for extraction of bacterial DNA | Observational  | NA       |
| NCT02925533 | Ph 1B B-701 in combination with pembrolizumab in metastatic transitional cell carcinoma of the urothelial tract                        | •Bladder cancer                                                                                                                                                           | •B-701                                             | •Drug: pembrolizumab                                                    | Interventional | •Phase 1 |
| NCT02695784 | Probiotics after discharge                                                                                                             | <ul style="list-style-type: none"> <li>•Microbiota</li> <li>•Bacteriophages</li> <li>•Infantile colic</li> <li>•Growth</li> </ul>                                         | •Dietary supplement: probiotic continuation        | NA                                                                      | Interventional | •Phase 4 |

**Table S2** Summary of bacteriophages combined with other antibiotic against MDR infections.

| Bacteriophage                                   | Combination                           | Target bacterial                       | Ref. |
|-------------------------------------------------|---------------------------------------|----------------------------------------|------|
| <i>Staphylococcus aureus</i> bacteriophage Sb-1 | Daptomycin<br>Vancomycin<br>Cefazolin | <i>Methicillin resistant S. aureus</i> | 1    |

|                                                         |                                                          |                                              |    |
|---------------------------------------------------------|----------------------------------------------------------|----------------------------------------------|----|
| Bacteriophage ECA2                                      | Ampicillin<br>Kamanycin<br>Tetracycline<br>Ciprofloxacin | <i>E. coli</i>                               | 2  |
| Bacteriophage ELY-1                                     | Ciprofloxacin                                            | <i>E. coli</i>                               | 3  |
| Bacteriophage cocktails                                 | Ciprofloxacin                                            | <i>P. aeruginosa</i>                         | 4  |
| Bacteriophages PN05 and PN09                            | Carvacrol                                                | <i>Pseudomonas syringae pv. actinidiae</i>   | 5  |
| Bacteriophage PEV20                                     | Ciprofloxacin                                            | <i>P. aeruginosa</i>                         | 6  |
| Bacteriophage P22                                       | Ciprofloxacin                                            | <i>S. typhimurium</i>                        | 7  |
| Bacteriophage vB_KpnM_P-KP2                             | Gentamicin                                               | <i>K47 serotype Klebsiella pneumoniae</i>    | 8  |
| Bacteriophage Endolysin SAL200                          | Standard-of-care (SOC) antibiotics                       | <i>Staphylococcus aureus</i>                 | 9  |
| Bacteriophage phiIPLA-RODI                              | Lytic protein CHAPSH3b                                   | <i>Staphylococcus aureus</i>                 | 10 |
| 5-Bacteriophage <i>P. aeruginosa</i> cocktail,<br>PAM2H | Ceftazidime<br>Ciprofloxacin<br>Gentamicin<br>Meropenem  | <i>P. aeruginosa</i>                         | 11 |
| Bacteriophage P100                                      | Nisin and sodium lactate                                 | <i>Listeria monocytogenes</i>                | 12 |
| Bacteriophage EcSw                                      | Kanamycin and chloramphenicol                            | <i>antibiotic-resistant Escherichia coli</i> | 13 |
| <i>Anti-S.aureus</i> purified bacteriophage             | Linezolid                                                | <i>Staphylococcus aureus</i>                 | 14 |
| Bacteriophage                                           | Cationic photosensitizer                                 | <i>A. baumannii</i>                          | 15 |
| Bacteriophage preparation                               | Lauric arginate ethyl ester                              | <i>Listeria monocytogenes</i>                | 16 |
| Bacteriophage endolysin                                 | Polysaccharide depolymerase                              | <i>Staphylococcus aureus</i>                 | 17 |

## Reference

1. Kebriaei R, Lev K, Morrisette T, Stamper K, Abdulmutakabbir J C, Lehman SM, et al. Bacteriophage-antibiotic combination strategy: an

- alternative against methicillin-resistant phenotypes of *Staphylococcus aureus*. *Antimicrob Agents Ch* 2020;**64**: e00461-20.
2. Valério N, Oliveira C, Jesus V, Branco T, Pereira C, Moreirinha C, et al. Effects of single and combined use of bacteriophages and antibiotics to inactivate *Escherichia coli*. *Virus Res* 2017;**240**:8-17.
  3. Ana, Lopes, Carla, Pereira, Adelaide, Almeida. Sequential combined effect of phages and Antibiotics on the inactivation of *Escherichia coli*. *Microorganisms* 2018;**6**:125.
  4. Luscher A, Simonin J, Falconnet L, Valot B, Hocquet D, Chanson M, et al. Combined bacteriophage and antibiotic treatment prevents *Pseudomonas aeruginosa* infection of wild type and cfr-epithelial cells. *Front Microbiol* 2020;**11**:1947.
  5. Ni P, Wang L, Deng B, Jiu S, Ma C, Zhang C, et al. Combined application of bacteriophages and carvacrol in the control of *Pseudomonas syringae* pv. actinidiae planktonic and biofilm forms. *Microorganisms* 2020;**8**:837.
  6. Chang RYK, Das T, Manos J, Kutter E, Morales S, Chan H-K. Bacteriophage PEV20 and ciprofloxacin combination treatment enhances removal of *Pseudomonas aeruginosa* biofilm isolated from cystic fibrosis and wound patients. *Aaps J* 2019;**21**:49.
  7. Petsong K, Uddin MJ, Vongkamjan K, Ahn J. Combined effect of bacteriophage and antibiotic on the inhibition of the development of antibiotic resistance in *Salmonella typhimurium*. *Food Sci and Biotechnol* 2018;**27**:1239-44.
  8. Wang Z, Cai R, Wang G, Guo Z, Liu X, Guan Y, et al. Combination therapy of Phage vB\_KpnM\_P-KP2 and gentamicin combats acute pneumonia caused by K47 Serotype *Klebsiella pneumoniae*. *Front Microbiol* 2021;**12**:926.
  9. Kim N-H, Park Wan B, Cho Jeong E, Choi Yoon J, Choi Su J, Jun Soo Y, et al. Effects of phage endolysin SAL200 combined with antibiotics on *Staphylococcus aureus* infection. *Antimicrob Agents Ch* 2018;**62**:e00731-18.

10. Duarte AC, Fernández L, De Maesschalck V, Gutiérrez D, Campelo A B, Briers Y, et al. Synergistic action of phage phiIPLA-RODI and lytic protein CHAPSH3b: a combination strategy to target *Staphylococcus aureus* biofilms. *Npj Biofilms Microbi* 2021;**7**:39.
11. Engeman E, Freyberger H R, Corey B W, Ward A M, He Y, Nikolich M P, et al. Synergistic killing and re-sensitization of *Pseudomonas aeruginosa* to antibiotics by phage-antibiotic combination treatment. *Pharmaceuticals* 2021;**14**:184.
12. Figueiredo ACL, Almeida RCC. Application of phage therapy: synergistic effect of phage EcSw ( $\Phi$ EcSw) and antibiotic combination towards antibiotic-resistant *Escherichia coli*. *Transbound Emerg Dis* 2020;**67**:2809-17.
13. Easwaran M, De Zoysa M, Shin H-J. Application of phage therapy: synergistic effect of phage EcSw ( $\Phi$ EcSw) and antibiotic combination towards antibiotic-resistant *Escherichia coli*. *Transbound Emerg Dis* 2020;**67**:2809-17.
14. Albac S, Medina M, Labrousse D, Hayez D, Bonnot D, Anzala N, et al. Efficacy of bacteriophages in a *Staphylococcus aureus* nondiabetic or diabetic foot infection murine model. *Antimicrob Agents Ch* 2020;**64**:e01870-19.
15. Ran B, Yuan Y, Xia W, Li M, Yao Q, Wang Z, et al. A photo-sensitizable phage for multidrug-resistant acinetobacter baumannii therapy and biofilm ablation. *Chem Sci* 2021;**12**:1054-61.
16. Yang S, Sadekuzzaman M, Ha S-D. Treatment with lauric arginate ethyl ester and commercial bacteriophage, alone or in combination, inhibits *Listeria monocytogenes* in chicken breast tissue. *Food Control* 2017;**78**:57-63.
17. Olsen NMC, Thiran E, Hasler T, Vanzieleghem T, Belibasakis GN, Mahillon J, et al. Synergistic removal of static and dynamic staphylococcus aureus biofilms by combined treatment with a bacteriophage endolysin and a polysaccharide depolymerase. *Viruses* 2018;**10**:438.
